# Supplementary material for: The Paths of the Galls: Differences in the Ecology and Distribution of Two European Oak Gall Wasps Andricus dentimitratus and Andricus pictus
Source: Hindawi journal article supplement (doi:10.1155/2022/8488412), 2022-11-30

Supplementary Materials

**Fig. S1**: Dissimilarity dendrograms obtained from the variable selection cluster. The red line represents the chosen threshold (0.3, correlation >70%). The variables selected for the models for *A. dentimitratus* (A) and the *A. pictus* (B) are shown in green; those discarded after applying the VIF are shown in red.


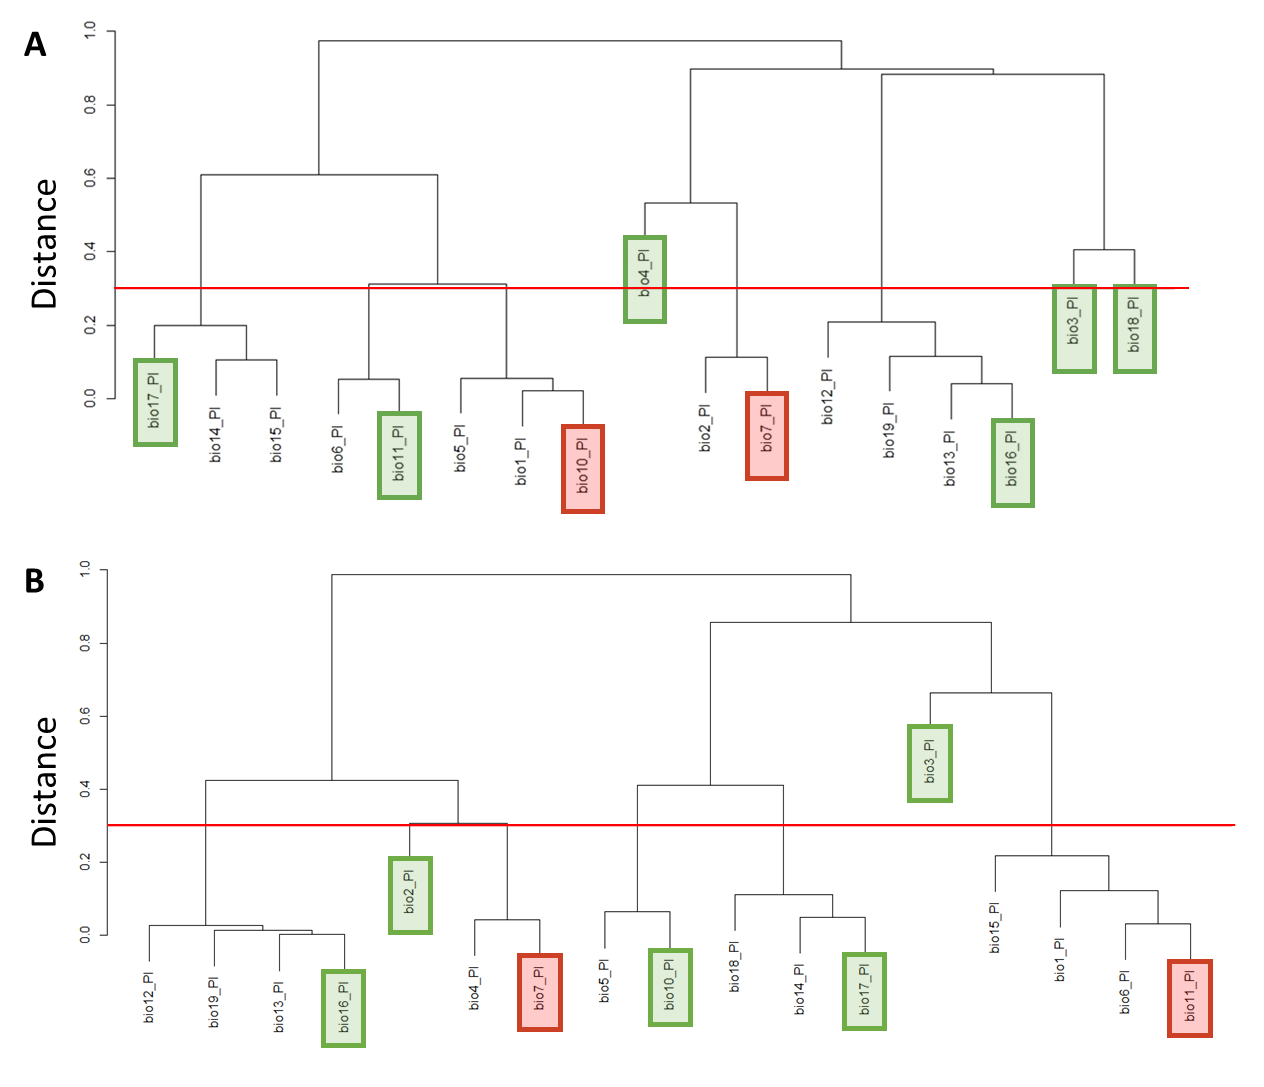

Supplement: f1 [file 8488412.f1.docx]
