# Supplementary material for: The Paths of the Galls: Differences in the Ecology and Distribution of Two European Oak Gall Wasps Andricus dentimitratus and Andricus pictus
Source: Hindawi journal article supplement (doi:10.1155/2022/8488412), 2022-11-30
Supplement: f2 [file 8488412.f2.docx]

| Species | Latitude | Longitude | Date | Source |
| --- | --- | --- | --- | --- |
| *Andricus dentimitratus* | 41.7302364 | 2.39879758 | 1980-1987 | Pujade/Villar, J. (1992d) Sobre Synergus ilicinus (Barbotin, 1972) n. comb. y otras especies de Synergus Htg. en el Nordeste de la Peninsula Ibérica (Hym., Cynipidae, Synergini). Boletin de la Asociación Española de Entomologie, 16, 129–148. |
| *Andricus dentimitratus* | 41.7956387 | 2.40282781 | 1982 | Pujade/Villar 1989b Sobre la variabilitat morfologia d'algunes espècies dels Ormyridae Foerster, una nueva familia d'himenopters per a Catalunya (Hymenoptera, Chalcidoidea). Sessió Conjunta d’ Entomologia de l’Institució Catalana d’História Natural i la Societat Catalana de Lepidopterologia, 5, 77–90 |
| *Andricus dentimitratus* | 41.9109352 | 2.51768361 | 1986-1987 | Pujade/Villar, J. (1992d) Sobre Synergus ilicinus (Barbotin, 1972) n. comb. y otras especies de Synergus Htg. en el Nordeste de la Peninsula Ibérica (Hym., Cynipidae, Synergini). Boletin de la Asociación Española de Entomologie, 16, 129–148. |
| *Andricus dentimitratus* | 41.6366583 | 1.91940776 | 1987 | Pujade/Villar, J. (1992d) Sobre Synergus ilicinus (Barbotin, 1972) n. comb. y otras especies de Synergus Htg. en el Nordeste de la Peninsula Ibérica (Hym., Cynipidae, Synergini). Boletin de la Asociación Española de Entomologie, 16, 129–148. |
| *Andricus dentimitratus* | 41.7302364 | 2.39879758 | 1987 | Pujade/Villar, J. (1992d) Sobre Synergus ilicinus (Barbotin, 1972) n. comb. y otras especies de Synergus Htg. en el Nordeste de la Peninsula Ibérica (Hym., Cynipidae, Synergini). Boletin de la Asociación Española de Entomologie, 16, 129–148. |
| *Andricus dentimitratus* | 41.7739743 | 2.4620554 | 1981-1988 | Pujade/Villar, J. (1993) Sobre els Megastigmus Dalman (Hymenoptera: Chalcidoidea, Torymidae) detectats a Catalunya a partir de la recol.lecció de cecidis de cinipids produits sobre Rosa i Quercus. Sessió Conjunta d’ Entomologia de l’Institució Catalana d’ História Natural (ICHN) i la Societat Catalana de Lepidopterologia 7(1991), 53–58. |
| *Andricus dentimitratus* | 41.7739743 | 2.4620554 | 1980-1988 | Pujade/Villar, J. (1993) Sobre els Megastigmus Dalman (Hymenoptera: Chalcidoidea, Torymidae) detectats a Catalunya a partir de la recol.lecció de cecidis de cinipids produits sobre Rosa i Quercus. Sessió Conjunta d’ Entomologia de l’Institució Catalana d’ História Natural (ICHN) i la Societat Catalana de Lepidopterologia 7(1991), 53–58. |
| *Andricus dentimitratus* | 41.7302364 | 2.39879758 | 1984 | Pujade/Villar, J. (1992d) Sobre Synergus ilicinus (Barbotin, 1972) n. comb. y otras especies de Synergus Htg. en el Nordeste de la Peninsula Ibérica (Hym., Cynipidae, Synergini). Boletin de la Asociación Española de Entomologie, 16, 129–148. |
| *Andricus dentimitratus* | 41.7739743 | 2.4620554 | 1986 | Pujade/Villar, J. (1993) Sobre els Megastigmus Dalman (Hymenoptera: Chalcidoidea, Torymidae) detectats a Catalunya a partir de la recol.lecció de cecidis de cinipids produits sobre Rosa i Quercus. Sessió Conjunta d’ Entomologia de l’Institució Catalana d’ História Natural (ICHN) i la Societat Catalana de Lepidopterologia 7(1991), 53–58. |
| *Andricus dentimitratus* | 43.0818168 | 10.9812238 | 2020 | https://www.inaturalist.org/observations/64434969 |
| *Andricus dentimitratus* | 48.1422785 | 16.2489275 | 2020 | https://www.inaturalist.org/observations/64103767 |
| *Andricus dentimitratus* | 41.2046065 | 14.7481759 | 2020 | https://www.inaturalist.org/observations/63872197 |
| *Andricus dentimitratus* | 47.9039494 | 16.1906594 | 2020 | https://www.inaturalist.org/observations/63890543 |
| *Andricus dentimitratus* | 41.2060829 | 14.7417718 | 2020 | https://www.inaturalist.org/observations/63753933 |
| *Andricus dentimitratus* | 41.1970774 | 14.7566227 | 2020 | https://www.inaturalist.org/observations/63690807 |
| *Andricus dentimitratus* | 47.8041459 | 16.0995047 | 2020 | https://www.inaturalist.org/observations/63504341 |
| *Andricus dentimitratus* | 47.8123781 | 16.1036095 | 2020 | https://www.inaturalist.org/observations/63504771 |
| *Andricus dentimitratus* | 47.7893747 | 16.1401158 | 2020 | https://www.inaturalist.org/observations/63505308 |
| *Andricus dentimitratus* | 43.8507945 | 10.6853749 | 2020 | https://www.inaturalist.org/observations/63756688 |
| *Andricus dentimitratus* | 43.3203969 | 5.73497509 | 2020 | https://www.inaturalist.org/observations/63117837 |
| *Andricus dentimitratus* | 41.748564 | 2.13007075 | 2020 | https://www.inaturalist.org/observations/62884087 |
| *Andricus dentimitratus* | 42.7639458 | 10.8750205 | 2020 | https://www.inaturalist.org/observations/62875480 |
| *Andricus dentimitratus* | 42.5084041 | 2.99827784 | 2020 | https://www.inaturalist.org/observations/62717238 |
| *Andricus dentimitratus* | 41.8915347 | 2.73914227 | 2020 | [https://www.biodiversidadvirtual.org/insectarium/Andricus/dentimitratus/(agallas)/img1262169.html](https://www.biodiversidadvirtual.org/insectarium/Andricus-dentimitratus-(agallas)-img1262169.html) |
| *Andricus dentimitratus* | 48.030031 | 16.2531537 | 2020 | https://www.inaturalist.org/observations/62194142 |
| *Andricus dentimitratus* | 41.8326873 | 2.40746067 | 2020 | https://www.inaturalist.org/observations/61781417 |
| *Andricus dentimitratus* | 48.1352989 | 16.2431686 | 2020 | https://www.inaturalist.org/observations/61556400 |
| *Andricus dentimitratus* | 41.897567 | 12.4026944 | 2020 | https://www.inaturalist.org/observations/61576324 |
| *Andricus dentimitratus* | 41.3570245 | 13.7507435 | 2020 | https://www.inaturalist.org/observations/61472314 |
| *Andricus dentimitratus* | 48.3349528 | 16.71913 | 2020 | https://www.inaturalist.org/observations/61853557 |
| *Andricus dentimitratus* | 43.2866151 | 10.6327004 | 2020 | https://www.inaturalist.org/observations/60973321 |
| *Andricus dentimitratus* | 41.8016531 | 2.34890775 | 2020 | https://www.inaturalist.org/observations/61008180 |
| *Andricus dentimitratus* | 41.8017195 | 2.34897458 | 2020 | https://www.inaturalist.org/observations/61075793 |
| *Andricus dentimitratus* | 42.1055508 | 2.22334562 | 2020 | https://www.inaturalist.org/observations/60804403 |
| *Andricus dentimitratus* | 43.1610336 | 10.8313685 | 2020 | https://www.inaturalist.org/observations/60522163 |
| *Andricus dentimitratus* | 42.9768769 | 1.59462825 | 2020 | https://www.inaturalist.org/observations/60730625 |
| *Andricus dentimitratus* | 43.561925 | 6.995555 | 2020 | https://www.inaturalist.org/observations/59802528 |
| *Andricus dentimitratus* | 40.7466921 | 14.0022392 | 2020 | https://www.inaturalist.org/observations/59557776 |
| *Andricus dentimitratus* | 44.3597655 | 8.54514074 | 2020 | https://www.inaturalist.org/observations/60169385 |
| *Andricus dentimitratus* | 43.472952 | 5.95342677 | 2020 | https://www.inaturalist.org/observations/59215435 |
| *Andricus dentimitratus* | 44.012361 | 6.724285 | 2020 | https://www.inaturalist.org/observations/58640254 |
| *Andricus dentimitratus* | 47.8056529 | 16.6311751 | 2020 | https://www.inaturalist.org/observations/58325861 |
| *Andricus dentimitratus* | 48.2272083 | 16.2702417 | 2020 | https://www.inaturalist.org/observations/58311318 |
| *Andricus dentimitratus* | 47.9534309 | 16.7741002 | 2020 | https://www.inaturalist.org/observations/57663946 |
| *Andricus dentimitratus* | 47.9540474 | 16.7751648 | 2020 | https://www.inaturalist.org/observations/57664013 |
| *Andricus dentimitratus* | 42.038839 | 2.078347 | 2020 | https://www.biodiversidadvirtual.org/insectarium/Andricus/dentimitratus/(agalla)/img1259473.html |
| *Andricus dentimitratus* | 43.4527714 | 6.75231233 | 2020 | https://www.inaturalist.org/observations/56114727 |
| *Andricus dentimitratus* | 43.8033767 | 6.23709678 | 2020 | https://www.inaturalist.org/observations/54381661 |
| *Andricus dentimitratus* | 42.6958639 | 11.5396646 | 2020 | https://www.inaturalist.org/observations/44773370 |
| *Andricus dentimitratus* | 42.2420174 | 2.69122659 | 2020 | https://www.inaturalist.org/observations/47323235 |
| *Andricus dentimitratus* | 42.715471 | 11.523463 | 2020 | https://www.inaturalist.org/observations/40024661 |
| *Andricus dentimitratus* | 41.8602833 | 16.0408617 | 2020 | https://www.inaturalist.org/observations/40206848 |
| *Andricus dentimitratus* | 42.040165 | 2.081161 | 2020 | https://www.biodiversidadvirtual.org/insectarium/Andricus/dentimitratus/img1187716.html |
| *Andricus dentimitratus* | 42.041535 | 2.081209 | 2020 | https://www.biodiversidadvirtual.org/insectarium/Andricus/dentimitratus/img1186230.html |
| *Andricus dentimitratus* | 42.105243 | 2.088904 | 2019 | https://www.biodiversidadvirtual.org/insectarium/Andricus/dentimitratus/(agallas)/img1231365.html |
| *Andricus dentimitratus* | 42.231787 | 1.196396 | 2019 | https://www.inaturalist.org/observations/35171150 |
| *Andricus dentimitratus* | 39.3583569 | 16.228827 | 2019 | https://www.inaturalist.org/observations/34750814 |
| *Andricus dentimitratus* | 41.956184 | 2.059212 | 2019 | https://www.biodiversidadvirtual.org/insectarium/Andricus/dentimitratus/(agalla)/img1170377.html |
| *Andricus dentimitratus* | 42.090834 | 1.525769 | 2019 | https://www.biodiversidadvirtual.org/insectarium/Andricus/dentimitratus/(agalla)/img1165833.html |
| *Andricus dentimitratus* | 43.44994 | 2849353 | 2019 | <https://observation.org/observation/180333308> |
| *Andricus dentimitratus* | 42.615879 | 11202765 | 2019 | https://observation.org/observation/180237616 |
| *Andricus dentimitratus* | 41.8699 | 2.411461 | 2019 | https://www.biodiversidadvirtual.org/insectarium/Andricus/dentimitratus/(agalla)/img1160040.html |
| *Andricus dentimitratus* | 43.838953 | 6434355 | 2019 | https://observation.org/observation/180127066 |
| *Andricus dentimitratus* | 43.836696 | 6421056 | 2019 | https://observation.org/observation/179892142 |
| *Andricus dentimitratus* | 41.754364 | 2.61485291 | 2019 | https://www.inaturalist.org/observations/32404586 |
| *Andricus dentimitratus* | 43.2526182 | 6.50229112 | 2019 | https://www.inaturalist.org/observations/30739359 |
| *Andricus dentimitratus* | 42.7081843 | 11.5268316 | 2019 | https://www.inaturalist.org/observations/25219067 |
| *Andricus dentimitratus* | 41.8842832 | 12.539446 | 2019 | https://www.inaturalist.org/observations/24497996 |
| *Andricus dentimitratus* | 42.044704 | 2.071223 | 2019 | [https://www.biodiversidadvirtual.org/insectarium/Andricus/dentimitratus/(agalla)/img1094527.html](https://www.biodiversidadvirtual.org/insectarium/Andricus-dentimitratus-(agalla)-img1094527.html) |
| *Andricus dentimitratus* | 42.03809 | 2.080429 | 2019 | [https://www.biodiversidadvirtual.org/insectarium/Andricus/dentimitratus/(agallas)/img1081497.html](https://www.biodiversidadvirtual.org/insectarium/Andricus-dentimitratus-(agallas)-img1081497.html) |
| *Andricus dentimitratus* | 41.827187 | 2809415 | 2019 | https://observation.org/observation/167249430 |
| *Andricus dentimitratus* | 44.4972371 | 3.87883577 | 2018 | https://www.inaturalist.org/observations/19175192 |
| *Andricus dentimitratus* | 44.4801413 | 3.86836164 | 2018 | https://www.inaturalist.org/observations/19175271 |
| *Andricus dentimitratus* | 42.040943 | 2.077188 | 2018 | https://www.biodiversidadvirtual.org/insectarium/Andricus/dentimitratus/(agallas)/img1072515.html |
| *Andricus dentimitratus* | 42.0388132 | 2.07833167 | 2018 | https://www.biodiversidadvirtual.org/insectarium/Andricus/dentimitratus/(agalla)/img1051719.html |
| *Andricus dentimitratus* | 42.0415331 | 2.3980837 | 2018 | https://www.inaturalist.org/observations/17066938 |
| *Andricus dentimitratus* | 41.8850323 | 2.07659457 | 2018 | https://www.inaturalist.org/observations/45397473 |
| *Andricus dentimitratus* | 41.6784219 | 12.6882073 | 2018 | https://www.inaturalist.org/observations/16824791 |
| *Andricus dentimitratus* | 41.9535592 | 12.7728326 | 2018 | https://www.inaturalist.org/observations/41479452 |
| *Andricus dentimitratus* | 42.037905 | 2.07906123 | 2018 | https://www.biodiversidadvirtual.org/insectarium/Andricus/dentimitratus/(agalla)/img1041133.html |
| *Andricus dentimitratus* | 42.8292977 | 11.1610422 | 2018 | https://www.inaturalist.org/observations/16176292 |
| *Andricus dentimitratus* | 42.9245003 | 12.3604186 | 2018 | https://www.inaturalist.org/observations/14689548 |
| *Andricus dentimitratus* | 42.0391819 | 2.07830293 | 2018 | https://www.biodiversidadvirtual.org/insectarium/Andricus/dentimitratus/(agalla)/img995610.html |
| *Andricus dentimitratus* | 42.0377077 | 2.07984924 | 2018 | https://www.biodiversidadvirtual.org/insectarium/Andricus/dentimitratus/(agalla)/img985196.html |
| *Andricus dentimitratus* | 42.0391819 | 2.07830293 | 2018 | https://www.biodiversidadvirtual.org/insectarium/Andricus/dentimitratus/(agalla)/img995613.html |
| *Andricus dentimitratus* | 41.8850096 | 12.4928075 | 2018 | https://www.inaturalist.org/observations/63782164 |
| *Andricus dentimitratus* | 42.4885121 | 11.2080614 | 2018 | https://www.inaturalist.org/observations/25566537 |
| *Andricus dentimitratus* | 42.0391819 | 2.07830293 | 2017 | https://www.biodiversidadvirtual.org/insectarium/Andricus/dentimitratus/(agalla)/img995621.html |
| *Andricus dentimitratus* | 42.7296902 | 11.5400795 | 2017 | https://www.inaturalist.org/observations/39403196 |
| *Andricus dentimitratus* | 43.8732503 | 10.832668 | 2017 | https://www.inaturalist.org/observations/8468567 |
| *Andricus dentimitratus* | 43.873273 | 10.832719 | 2017 | https://www.inaturalist.org/observations/8468734 |
| *Andricus dentimitratus* | 37.660145 | 14.968657 | 2017 | Naturgucker |
| *Andricus dentimitratus* | 41.9511111 | 12.4255556 | 2017 | https://www.inaturalist.org/observations/8341289 |
| *Andricus dentimitratus* | 42.0391819 | 2.07830293 | 2017 | https://www.biodiversidadvirtual.org/insectarium/Andricus/dentimitratus/(agalla)/img995624.html |
| *Andricus dentimitratus* | 42.0391819 | 2.07830293 | 2017 | https://www.biodiversidadvirtual.org/insectarium/Andricus/dentimitratus/(agallas)/img995619.html |
| *Andricus dentimitratus* | 37.8778815 | 14.9507373 | 2017 | https://www.inaturalist.org/observations/8991999 |
| *Andricus dentimitratus* | 43.743694 | 6.302204 | 2017 | Naturgucker |
| *Andricus dentimitratus* | 40.8484099 | 14.1005777 | 2017 | https://www.inaturalist.org/observations/7784849 |
| *Andricus dentimitratus* | 42.129588 | 1.95423603 | 2017 | https://www.biodiversidadvirtual.org/insectarium/Andricus/dentimitratus/(agallas)/img924590.html |
| *Andricus dentimitratus* | 42.129588 | 1.95423603 | 2017 | https://www.biodiversidadvirtual.org/insectarium/Andricus/dentimitratus/(agallas)/img924591.html |
| *Andricus dentimitratus* | 40.15205 | 9.51635 | 2017 | https://www.inaturalist.org/observations/7532736 |
| *Andricus dentimitratus* | 42.0487014 | 2.15008557 | 2017 | https://www.biodiversidadvirtual.org/insectarium/Andricus/dentimitratus/(agalla)/img925212.html |
| *Andricus dentimitratus* | 42.0447673 | 2.0704937 | 2017 | https://www.biodiversidadvirtual.org/insectarium/Andricus/dentimitratus/(agalla)/img922235.html |
| *Andricus dentimitratus* | 42.0449585 | 2.0716095 | 2017 | https://www.biodiversidadvirtual.org/insectarium/Andricus/dentimitratus/(agalla)/img915812.html |
| *Andricus dentimitratus* | 42.0449585 | 2.0716095 | 2017 | https://www.biodiversidadvirtual.org/insectarium/Andricus/dentimitratus/(agalla)/img915804.html |
| *Andricus dentimitratus* | 42.0449585 | 2.0716095 | 2017 | https://www.biodiversidadvirtual.org/insectarium/Andricus/dentimitratus/(agallas)/img915802.html |
| *Andricus dentimitratus* | 43.277986 | 6298056 | 2016 | https://observation.org/observation/133614893 |
| *Andricus dentimitratus* | 43.766632 | 6.299973 | 2016 | Naturgucker |
| *Andricus dentimitratus* | 42.0422495 | 2.08143711 | 2016 | [https://www.biodiversidadvirtual.org/insectarium/Andricus/dentimitratus/(agallas)/img837800.html](https://www.biodiversidadvirtual.org/insectarium/Andricus-dentimitratus-(agallas)-img837800.html) |
| *Andricus dentimitratus* | 44.2393875 | 6.01429388 | 2016 | https://www.inaturalist.org/observations/23521828 |
| *Andricus dentimitratus* | 42.0422495 | 2.08143711 | 2016 | [https://www.biodiversidadvirtual.org/insectarium/Andricus/dentimitratus/(agalla)/img837795.html](https://www.biodiversidadvirtual.org/insectarium/Andricus-dentimitratus-(agalla)-img837795.html) |
| *Andricus dentimitratus* | 42.3121321 | 2.22636259 | 2016 | [https://www.biodiversidadvirtual.org/insectarium/Andricus/dentimitratus/(agalla)/img820836.html](https://www.biodiversidadvirtual.org/insectarium/Andricus-dentimitratus-(agalla)-img820836.html) |
| *Andricus dentimitratus* | 42.0425045 | 2.08293915 | 2016 | [https://www.biodiversidadvirtual.org/insectarium/Andricus/dentimitratus/(agallas)/img779802.html](https://www.biodiversidadvirtual.org/insectarium/Andricus-dentimitratus-(agallas)-img779802.html) |
| *Andricus dentimitratus* | 42.0348437 | 2.3700711 | 2016 | [https://www.biodiversidadvirtual.org/insectarium/Andricus/dentimitratus/(agalla)/img772442.html](https://www.biodiversidadvirtual.org/insectarium/Andricus-dentimitratus-(agalla)-img772442.html) |
| *Andricus dentimitratus* | 42.0430463 | 2.08188772 | 2016 | [https://www.biodiversidadvirtual.org/insectarium/Andricus/dentimitratus/(agalla)/img773460.html](https://www.biodiversidadvirtual.org/insectarium/Andricus-dentimitratus-(agalla)-img773460.html) |
| *Andricus dentimitratus* | 41.7703452 | 2.4659484 | 2015 | [https://www.biodiversidadvirtual.org/insectarium/Andricus/dentimitratus/(agalla)/img762377.html](https://www.biodiversidadvirtual.org/insectarium/Andricus-dentimitratus-(agalla)-img762377.html) |
| *Andricus dentimitratus* | 41.7703452 | 2.4659484 | 2015 | [https://www.biodiversidadvirtual.org/insectarium/Andricus/dentimitratus/(agallas)/img762378.html](https://www.biodiversidadvirtual.org/insectarium/Andricus-dentimitratus-(agallas)-img762378.html) |
| *Andricus dentimitratus* | 41.7703452 | 2.4659484 | 2015 | [https://www.biodiversidadvirtual.org/insectarium/Andricus/dentimitratus/(agallas)/img762379.html](https://www.biodiversidadvirtual.org/insectarium/Andricus-dentimitratus-(agallas)-img762379.html) |
| *Andricus dentimitratus* | 42.1034763 | 2.0878315 | 2015 | [https://www.biodiversidadvirtual.org/insectarium/Andricus/dentimitratus/(agalla)/img808055.html](https://www.biodiversidadvirtual.org/insectarium/Andricus-dentimitratus-(agalla)-img808055.html) |
| *Andricus dentimitratus* | 42.6051764 | 11.4522161 | 2015 | http://www.inaturalist.org/observations/1929554 |
| *Andricus dentimitratus* | 43.68824 | 6.78351 | 2015 | Données photographiques validées de la galerie du forum 'Le Monde des Insectes' |
| *Andricus dentimitratus* | 43.68824 | 6.78351 | 2015 | Données photographiques validées de la galerie du forum 'Le Monde des Insectes' |
| *Andricus dentimitratus* | 43.68386 | 6.90736 | 2015 | Données photographiques validées de la galerie du forum 'Le Monde des Insectes' |
| *Andricus dentimitratus* | 43.68824 | 6.78351 | 2015 | Données photographiques validées de la galerie du forum 'Le Monde des Insectes' |
| *Andricus dentimitratus* | 42.7962 | 2338658 | 2015 | https://observation.org/observation/113683892 |
| *Andricus dentimitratus* | 43.76921 | 7.03752 | 2015 | Données photographiques validées de la galerie du forum 'Le Monde des Insectes' |
| *Andricus dentimitratus* | 42.0427063 | 2.08130836 | 2014 | https://www.biodiversidadvirtual.org/insectarium/Andricus/dentimitratus/(agalla)/img658498.html |
| *Andricus dentimitratus* | 42.0427063 | 2.08130836 | 2014 | https://www.biodiversidadvirtual.org/insectarium/Andricus/dentimitratus/(agalla)/img658499.html |
| *Andricus dentimitratus* | 43.865198 | 6196017 | 2014 | https://observation.org/observation/89053980 |
| *Andricus dentimitratus* | 42.0887484 | 2.44059563 | 2013 | https://www.biodiversidadvirtual.org/insectarium/Andricus/dentimitratus/(agalla)/img499663.html |
| *Andricus dentimitratus* | 42.0887484 | 2.44059563 | 2013 | https://www.biodiversidadvirtual.org/insectarium/Andricus/dentimitratus/(agalla)/img499664.html |
| *Andricus dentimitratus* | 44.0430239 | 9.8431866 | 2013 | https://www.inaturalist.org/observations/58127575 |
| *Andricus dentimitratus* | 44.06771 | 0.6184 | 2012 | CEN PACA / SILENE |
| *Andricus dentimitratus* | 41.840999 | 2.36036339 | 2012 | https://www.biodiversidadvirtual.org/insectarium/Andricus/dentimitratus/(agalla)/img305075.html |
| *Andricus dentimitratus* | 42.6742513 | 11.4908701 | 2012 | https://www.inaturalist.org/observations/34535964 |
| *Andricus dentimitratus* | 41.69948 | 1.976545 | 2011 | [https://www.biodiversidadvirtual.org/insectarium/Andricus/dentimitratus/(agalla)/img260570.html](https://www.biodiversidadvirtual.org/insectarium/Andricus-dentimitratus-(agalla)-img260570.html) |
| *Andricus dentimitratus* | 43.318832 | 6317847 | 2011 | https://observation.org/observation/72460760 |
| *Andricus dentimitratus* | 42.2602822 | 2.28956682 | 2011 | [https://www.biodiversidadvirtual.org/insectarium/Andricus/dentimitratus/(agalla)/img268090.html](https://www.biodiversidadvirtual.org/insectarium/Andricus-dentimitratus-(agalla)-img268090.html) |
| *Andricus dentimitratus* | 42.0498687 | 2.14855604 | 2011 | [https://www.biodiversidadvirtual.org/insectarium/Andricus/dentimitratus/(agalla)/img208143.html](https://www.biodiversidadvirtual.org/insectarium/Andricus-dentimitratus-(agalla)-img208143.html) |
| *Andricus dentimitratus* | 41.8531964 | 2.42214203 | 2011 | [https://www.biodiversidadvirtual.org/insectarium/Andricus/dentimitratus/(agallas)/img189130.html](https://www.biodiversidadvirtual.org/insectarium/Andricus-dentimitratus-(agallas)-img189130.html) |
| *Andricus dentimitratus* | 42.260271 | 2.28916883 | 2011 | [https://www.biodiversidadvirtual.org/insectarium/Andricus/dentimitratus/(agallas)/img187902.html](https://www.biodiversidadvirtual.org/insectarium/Andricus-dentimitratus-(agallas)-img187902.html) |
| *Andricus dentimitratus* | 41.8555938 | 2.42330074 | 2011 | [https://www.biodiversidadvirtual.org/insectarium/Andricus/dentimitratus/(agalla)/img182797.html](https://www.biodiversidadvirtual.org/insectarium/Andricus-dentimitratus-(agalla)-img182797.html) |
| *Andricus dentimitratus* | 42.150029 | 2.1155174 | 2010 | [https://www.biodiversidadvirtual.org/insectarium/Andricus/dentimitratus/(agallas)/img172627.html](https://www.biodiversidadvirtual.org/insectarium/Andricus-dentimitratus-(agallas)-img172627.html) |
| *Andricus dentimitratus* | 42.0514277 | 2.47595787 | 2010 | [https://www.biodiversidadvirtual.org/insectarium/Andricus/dentimitratus/(agallas)/img179246.html](https://www.biodiversidadvirtual.org/insectarium/Andricus-dentimitratus-(agallas)-img179246.html) |
| *Andricus dentimitratus* | 41.7739743 | 2.4620554 | 2009 | [https://www.biodiversidadvirtual.org/insectarium/Andricus/dentimitratus/(agallas)/img100267.html](https://www.biodiversidadvirtual.org/insectarium/Andricus-dentimitratus-(agallas)-img100267.html) |
| *Andricus dentimitratus* | 41.7739743 | 2.4620554 | 2009 | [https://www.biodiversidadvirtual.org/insectarium/Andricus/dentimitratus/(agallas)/img100265.html](https://www.biodiversidadvirtual.org/insectarium/Andricus-dentimitratus-(agallas)-img100265.html) |
| *Andricus dentimitratus* | 41.8150126 | 2.234349 | 2009 | [https://www.biodiversidadvirtual.org/insectarium/Andricus/dentimitratus/(agalla)/img100115.html](https://www.biodiversidadvirtual.org/insectarium/Andricus-dentimitratus-(agalla)-img100115.html) |
| *Andricus dentimitratus* | 42.53014 | 3.0232 | 2008 | RNF |
| *Andricus dentimitratus* | 42.028243 | 2.073759 | 2005 | [https://www.biodiversidadvirtual.org/insectarium/Andricus/dentimitratus/(agalla)/img18801.html](https://www.biodiversidadvirtual.org/insectarium/Andricus-dentimitratus-(agalla)-img18801.html) |
| *Andricus dentimitratus* | 42.53014 | 3.0232 | 2003 | RNF |
| *Andricus dentimitratus* | 42.53014 | 3.0232 | 2002 | RNF |
| *Andricus dentimitratus* | 42.53014 | 3.0232 | 2002 | RNF |
| *Andricus dentimitratus* | 42.53014 | 3.0232 | 2002 | RNF |
| *Andricus dentimitratus* | 43.99966 | 5.30692 | 1999 | CEN PACA / SILENE |
| *Andricus dentimitratus* | 43.81706 | 5.42389 | 1999 | CEN PACA / SILENE |
| *Andricus dentimitratus* | 43.81975 | 5.29966 | 1999 | CEN PACA / SILENE |
| *Andricus dentimitratus* | 43.90701 | 5.42771 | 1999 | CEN PACA / SILENE |
| *Andricus dentimitratus* | 43.90417 | 5.55212 | 1998 | CEN PACA / SILENE |
| *Andricus dentimitratus* | 43.90701 | 5.42771 | 1998 | CEN PACA / SILENE |
| *Andricus dentimitratus* | 42.53014 | 3.0232 | 1994 | RNF |
| *Andricus dentimitratus* | 42.53014 | 3.0232 | 1994 | RNF |
| *Andricus dentimitratus* | 42.53014 | 3.0232 | 1994 | RNF |
| *Andricus dentimitratus* | 42.53014 | 3.0232 | 1993 | RNF |
| *Andricus dentimitratus* | 43.68824 | 6.78351 | 1990 | Données photographiques validées de la galerie du forum 'Le Monde des Insectes' |
| *Andricus dentimitratus* | 42.3399374 | 2.00456165 | 1989 | Nieves/Aldrey, J.L. (2001a). Nuevos datos faunísticos, corológicos y biológicos sobre los cinípidos del ámbito Ibero/Balear (Hymenoptera, Cynipidae). Graellsia, 57(1), 39–72. |
| *Andricus dentimitratus* | 41.7936927 | 2.48245597 | 1988 | Nieves/Aldrey, J.L. (2001a). Nuevos datos faunísticos, corológicos y biológicos sobre los cinípidos del ámbito Ibero/Balear (Hymenoptera, Cynipidae). Graellsia, 57(1), 39–72. |
| *Andricus dentimitratus* | 42.2073682 | 2.35795214 | 1988 | Nieves/Aldrey, J.L. (2001a). Nuevos datos faunísticos, corológicos y biológicos sobre los cinípidos del ámbito Ibero/Balear (Hymenoptera, Cynipidae). Graellsia, 57(1), 39–72. |
| *Andricus dentimitratus* | 44.02255 | 3.56133 | 1987 | CardObs / UMS PatriNat |
| *Andricus dentimitratus* | 41.4372226 | 1.7910577 | 1985 | Nieves/Aldrey, J.L. (2001a). Nuevos datos faunísticos, corológicos y biológicos sobre los cinípidos del ámbito Ibero/Balear (Hymenoptera, Cynipidae). Graellsia, 57(1), 39–72. |
| *Andricus dentimitratus* | 49.49293 | 0.72305 | 1985 | CardObs / UMS PatriNat |
| *Andricus dentimitratus* | 41.8208696 | 2.51836008 |  | Nieves/Aldrey, J.L. & Pujade/Villar, J. (1986) Sobre las especies ibéricas de la Sección I (Mayr, 1872) del genéro Synergus Htg. (Hym., Cynipidae, Cynipinae). Eos, 61, 219–237. |
| *Andricus dentimitratus* | 41.7738905 | 2.46169687 |  | Banc de dades de biodiversitat de Catalunya/ArtroCat |
| *Andricus dentimitratus* | 41.7738905 | 2.46169687 |  | Banc de dades de biodiversitat de Catalunya/ArtroCat |
| *Andricus dentimitratus* | 41.7559383 | 2.44005733 |  | Banc de dades de biodiversitat de Catalunya/ArtroCat |
| *Andricus dentimitratus* | 42.0221462 | 2.53716983 |  | Banc de dades de biodiversitat de Catalunya/ArtroCat |
| *Andricus dentimitratus* | 41.7738905 | 2.46169687 |  | Banc de dades de biodiversitat de Catalunya/ArtroCat |
| *Andricus dentimitratus* | 41.6161255 | 2.01114466 |  | Banc de dades de biodiversitat de Catalunya/ArtroCat |
| *Andricus dentimitratus* | 41.8358914 | 2.28445189 |  | Banc de dades de biodiversitat de Catalunya/ArtroCat |
| *Andricus dentimitratus* | 41.7412656 | 2.50082377 |  | Banc de dades de biodiversitat de Catalunya/ArtroCat |
| *Andricus dentimitratus* | 41.7559383 | 2.44005733 |  | Banc de dades de biodiversitat de Catalunya/ArtroCat |
| *Andricus dentimitratus* | 41.7738905 | 2.46169687 |  | Banc de dades de biodiversitat de Catalunya/ArtroCat |
| *Andricus dentimitratus* | 41.9385592 | 2.84103739 |  | Banc de dades de biodiversitat de Catalunya/ArtroCat |
| *Andricus dentimitratus* | 41.7738905 | 2.46169687 |  | Banc de dades de biodiversitat de Catalunya/ArtroCat |
| *Andricus dentimitratus* | 41.7559383 | 2.44005733 |  | Banc de dades de biodiversitat de Catalunya/ArtroCat |
| *Andricus dentimitratus* | 41.7559383 | 2.44005733 |  | Banc de dades de biodiversitat de Catalunya/ArtroCat |
| *Andricus dentimitratus* | 41.7738905 | 2.46169687 |  | Banc de dades de biodiversitat de Catalunya/ArtroCat |
| *Andricus dentimitratus* | 41.7559383 | 2.44005733 |  | Banc de dades de biodiversitat de Catalunya/ArtroCat |
| *Andricus dentimitratus* | 41.6753884 | 2.00089414 |  | Banc de dades de biodiversitat de Catalunya/ArtroCat |
| *Andricus dentimitratus* | 41.7738905 | 2.46169687 |  | Banc de dades de biodiversitat de Catalunya/ArtroCat |
| *Andricus dentimitratus* | 41.8416936 | 2.24912859 |  | Banc de dades de biodiversitat de Catalunya/ArtroCat |
| *Andricus dentimitratus* | 41.6161255 | 2.01114466 |  | Banc de dades de biodiversitat de Catalunya/ArtroCat |
| *Andricus dentimitratus* | 41.7559383 | 2.44005733 |  | Banc de dades de biodiversitat de Catalunya/ArtroCat |
| *Andricus dentimitratus* | 41.7559383 | 2.44005733 |  | Banc de dades de biodiversitat de Catalunya/ArtroCat |
| *Andricus dentimitratus* | 41.7559383 | 2.44005733 |  | Banc de dades de biodiversitat de Catalunya/ArtroCat |
| *Andricus dentimitratus* | 41.7738905 | 2.46169687 |  | Banc de dades de biodiversitat de Catalunya/ArtroCat |
| *Andricus dentimitratus* | 41.7738905 | 2.46169687 |  | Banc de dades de biodiversitat de Catalunya/ArtroCat |
| *Andricus dentimitratus* | 42.53014 | 3.0232 |  | RNF |
| *Andricus dentimitratus* | 42.53014 | 3.0232 |  | RNF |
| *Andricus dentimitratus* | 41.862144 | 13.132489 | 2021 | <https://www.inaturalist.org/observations/70136498> |
| *Andricus dentimitratus* | 48.033781 | 16.27387 | 2021 | <https://www.inaturalist.org/observations/69823971> |
| *Andricus dentimitratus* | 42.10995 | 2.197166 | 2021 | <https://www.inaturalist.org/observations/68106847> |
| *Andricus dentimitratus* | 40.882337 | 16.577463 | 2021 | <https://www.inaturalist.org/observations/67574934> |
| *Andricus dentimitratus* | 44.113743 | 10.394712 | 2021 | <https://www.inaturalist.org/observations/67512258> |
| *Andricus dentimitratus* | 48.101085 | 16.234571 | 2020 | <https://www.inaturalist.org/observations/66241669> |
| *Andricus dentimitratus* | 42.715785 | 11.540318 | 2020 | <https://www.inaturalist.org/observations/65691359> |
| *Andricus dentimitratus* | 42.713482 | 11.543133 | 2020 | <https://www.inaturalist.org/observations/65691266> |
| *Andricus dentimitratus* | 42.045269 | 2.632292 | 2020 | <https://www.inaturalist.org/observations/61584995> |
| *Andricus dentimitratus* | 44.2905 | 5.8686 | 2021 | https://observation.org/observation/227746204/ |
| *Andricus dentimitratus* | 44.2905 | 5.8686 | 2021 | <https://observation.org/observation/225551298/> |
| *Andricus dentimitratus* | 42.6143 | 2.5047 | 2020 | https://observation.org/observation/204613369/ |
| *Andricus pictus* | 40.5960348 | -4.16612545 | 2000 | Gómez, J.F., Hernández Nieves, M., Garrido Torres, A.M., Askew, R.R. & Nieves-Aldrey, J.L. (2006) Los Chalcidoidea (Hymenoptera) asociados con agallas de cinípidos (Hymenoptera, Cynipidae) en la Comunidad de Madrid. Graellsia, 62, 293–331 |
| *Andricus pictus* | 40.4129813 | -3.88923344 | 2003 | Gómez, J.F., Hernández Nieves, M., Garrido Torres, A.M., Askew, R.R. & Nieves-Aldrey, J.L. (2006) Los Chalcidoidea (Hymenoptera) asociados con agallas de cinípidos (Hymenoptera, Cynipidae) en la Comunidad de Madrid. Graellsia, 62, 293–331 |
| *Andricus pictus* | 40.7955753 | -3.60062163 | 1985 | Gómez, J.F., Hernández Nieves, M., Garrido Torres, A.M., Askew, R.R. & Nieves-Aldrey, J.L. (2006) Los Chalcidoidea (Hymenoptera) asociados con agallas de cinípidos (Hymenoptera, Cynipidae) en la Comunidad de Madrid. Graellsia, 62, 293–331 |
| *Andricus pictus* | 40.5831156 | -4.12703536 | 1986 | Gómez, J.F., Hernández Nieves, M., Garrido Torres, A.M., Askew, R.R. & Nieves-Aldrey, J.L. (2006) Los Chalcidoidea (Hymenoptera) asociados con agallas de cinípidos (Hymenoptera, Cynipidae) en la Comunidad de Madrid. Graellsia, 62, 293–331 |
| *Andricus pictus* | 40.8896484 | -3.88782411 | 1986 | Gómez, J.F., Hernández Nieves, M., Garrido Torres, A.M., Askew, R.R. & Nieves-Aldrey, J.L. (2006) Los Chalcidoidea (Hymenoptera) asociados con agallas de cinípidos (Hymenoptera, Cynipidae) en la Comunidad de Madrid. Graellsia, 62, 293–331 |
| *Andricus pictus* | 40.8244999 | -3.55141674 | 1985 | Gómez, J.F., Hernández Nieves, M., Garrido Torres, A.M., Askew, R.R. & Nieves-Aldrey, J.L. (2006) Los Chalcidoidea (Hymenoptera) asociados con agallas de cinípidos (Hymenoptera, Cynipidae) en la Comunidad de Madrid. Graellsia, 62, 293–331 |
| *Andricus pictus* | 41.2989353 | -3.39598658 | 2020 | https://www.biodiversidadvirtual.org/insectarium/Andricus-pictus-(agalla)-img1262769.html |
| *Andricus pictus* | 37.9093748 | -6.8206156 | 2007 | https://www.biodiversidadvirtual.org/insectarium/Andricus-pictus-(agalla)-img170715.html |
| *Andricus pictus* | 37.9298972 | -6.67549253 | 2013 | https://www.biodiversidadvirtual.org/insectarium/Andricus-pictus-(agalla)-img519175.html |
| *Andricus pictus* | 39.8622541 | -6.2319901 | 2008 | https://www.biodiversidadvirtual.org/insectarium/Andricus-pictus-(agalla)-img58060.html |
| *Andricus pictus* | 37.7204913 | -5.54672241 | 2009 | https://www.biodiversidadvirtual.org/insectarium/Andricus-pictus-(agalla)-img61026.html |
| *Andricus pictus* | 40.5403425 | -4.1596946 | 2015 | https://www.biodiversidadvirtual.org/insectarium/Andricus-pictus-(agalla)-img744826.html |
| *Andricus pictus* | 40.8134633 | -3.7785067 | 2016 | https://www.biodiversidadvirtual.org/insectarium/Andricus-pictus-(agalla)-img784347.html |
| *Andricus pictus* | 40.8214741 | -3.78485441 | 2016 | https://www.biodiversidadvirtual.org/insectarium/Andricus-pictus-(agalla)-img785001.html |
| *Andricus pictus* | 40.8137443 | -1.22313023 | 2016 | https://www.biodiversidadvirtual.org/insectarium/Andricus-pictus-(agalla)-img827048.html |
| *Andricus pictus* | 40.4777536 | -4.65264559 | 2017 | https://www.biodiversidadvirtual.org/insectarium/Andricus-pictus-(agalla)-img947411.html |
| *Andricus pictus* | 39.3667948 | -4.5171194 | 2009 | https://www.biodiversidadvirtual.org/insectarium/Andricus-pictus-(agalla)-img99139.html |
| *Andricus pictus* | 39.3667948 | -4.5171194 | 2009 | https://www.biodiversidadvirtual.org/insectarium/Andricus-pictus-(agalla)-img99140.html |
| *Andricus pictus* | 39.3667948 | -4.5171194 | 2009 | https://www.biodiversidadvirtual.org/insectarium/Andricus-pictus-(agalla)-img99141.html |
| *Andricus pictus* | 40.862527 | -3.733506 | 2020 | https://www.biodiversidadvirtual.org/insectarium/Andricus-pictus-(agallas)-img1257818.html |
| *Andricus pictus* | 40.4106206 | -6.49197578 | 2007 | https://www.biodiversidadvirtual.org/insectarium/Andricus-pictus-(agallas)-img181721.html |
| *Andricus pictus* | 40.1398976 | -4.73174638 | 2012 | https://www.biodiversidadvirtual.org/insectarium/Andricus-pictus-(agallas)-img354937.html |
| *Andricus pictus* | 40.3169515 | -4.5231264 | 2015 | https://www.biodiversidadvirtual.org/insectarium/Andricus-pictus-(agallas)-img716462.html |
| *Andricus pictus* | 40.3169515 | -4.5231264 | 2015 | https://www.biodiversidadvirtual.org/insectarium/Andricus-pictus-(agallas)-img716463.html |
| *Andricus pictus* | 40.8146494 | -3.77457639 | 2015 | https://www.biodiversidadvirtual.org/insectarium/Andricus-pictus-(agallas)-img754040.html |
| *Andricus pictus* | 40.5725172 | -4.15587902 | 2015 | https://www.biodiversidadvirtual.org/insectarium/Andricus-pictus-(agallas)-img755000.html |
| *Andricus pictus* | 40.8126281 | -3.7805475 | 2016 | https://www.biodiversidadvirtual.org/insectarium/Andricus-pictus-(agallas)-img784688.html |
| *Andricus pictus* | 40.8114262 | -3.7657848 | 2016 | https://www.biodiversidadvirtual.org/insectarium/Andricus-pictus-(agallas)-img786741.html |
| *Andricus pictus* | 40.8137443 | -1.22313023 | 2016 | https://www.biodiversidadvirtual.org/insectarium/Andricus-pictus-(agallas)-img827047.html |
| *Andricus pictus* | 39.3667948 | -4.5171194 | 2009 | https://www.biodiversidadvirtual.org/insectarium/Andricus-pictus-(agallas)-img99137.html |
| *Andricus pictus* | 39.3667948 | -4.5171194 | 2009 | https://www.biodiversidadvirtual.org/insectarium/Andricus-pictus-(agallas)-img99142.html |
| *Andricus pictus* | 40.9111561 | -1.1011342 | 2015 | https://www.biodiversidadvirtual.org/insectarium/Andricus-pictus-img741298.html |
| *Andricus pictus* | 40.9111561 | -1.1011342 | 2015 | https://www.biodiversidadvirtual.org/insectarium/Andricus-pictus-img741299.html |
| *Andricus pictus* | 40.128685 | -7.084428 | 2019 | <https://www.inaturalist.org/observations/58418663> |
| *Andricus pictus* | 38.902206 | -9.183814 | 2020 | <https://www.inaturalist.org/observations/60364160> |
| *Andricus pictus* | 40.348151 | -7.913346 | 2020 | <https://www.inaturalist.org/observations/60750580> |
| *Andricus pictus* | 41.046317 | -3.545357 | 2020 | <https://www.inaturalist.org/observations/61258739> |
| *Andricus pictus* | 36.9475 | 8.94361111 | 2009 | J. Pujade-Villar et al., Les Cynipidae des chênes collectés dans la chaîne de Khmir, Orsis 25, 2011 |
| *Andricus pictus* | 40.5547302 | -4.1811131 | 1989-1986 | Nieves-Aldrey, J.L. & Pujade-Villar, J. (1986) Sobre las especies ibéricas de la Sección I (Mayr, 1872) del genéro Synergus Htg. (Hym., Cynipidae, Cynipinae). Eos, 61, 219–237. |
| *Andricus pictus* | 40.4301359 | -5.69962036 |  | Nieves-Aldrey, J.L. & Pujade-Villar, J. (1986) Sobre las especies ibéricas de la Sección I (Mayr, 1872) del genéro Synergus Htg. (Hym., Cynipidae, Cynipinae). Eos, 61, 219–237. |
| *Andricus pictus* | 40.7291454 | -4.01473275 | 1983 | Nieves-Aldrey, J.L. & Pujade-Villar, J. (1986) Sobre las especies ibéricas de la Sección I (Mayr, 1872) del genéro Synergus Htg. (Hym., Cynipidae, Cynipinae). Eos, 61, 219–237. |
| *Andricus pictus* | 40.2950005 | -6.71751173 |  | Nieves-Aldrey, J.L. & Pujade-Villar, J. (1986) Sobre las especies ibéricas de la Sección I (Mayr, 1872) del genéro Synergus Htg. (Hym., Cynipidae, Cynipinae). Eos, 61, 219–237. |
| *Andricus pictus* | 41.222556 | -5.70811429 |  | Nieves-Aldrey, J.L. & Pujade-Villar, J. (1986) Sobre las especies ibéricas de la Sección I (Mayr, 1872) del genéro Synergus Htg. (Hym., Cynipidae, Cynipinae). Eos, 61, 219–237. |
| *Andricus pictus* | 40.2588756 | -5.70455406 |  | Nieves-Aldrey, J.L. & Pujade-Villar, J. (1986) Sobre las especies ibéricas de la Sección I (Mayr, 1872) del genéro Synergus Htg. (Hym., Cynipidae, Cynipinae). Eos, 61, 219–237. |
| *Andricus pictus* | 40.5097323 | -5.76181813 |  | Nieves-Aldrey, J.L. & Pujade-Villar, J. (1986) Sobre las especies ibéricas de la Sección I (Mayr, 1872) del genéro Synergus Htg. (Hym., Cynipidae, Cynipinae). Eos, 61, 219–237. |
| *Andricus pictus* | 40.335308 | -5.89593525 | 1978 | Nieves-Aldrey, J.L. (1982a) Eupélmidos (Hym. Eupelmidae) que parasitan a los pobladores de las agallas de producidas en especies del género Quercus en la provincia de Salamanca. Boletin de la Asociación Española de cinipidos Entomologia, 5, 143–150. |
| *Andricus pictus* | 40.5999086 | -6.53045323 | 1979 | Nieves-Aldrey, J.L. (1982c) Nuevas datos sobre las especies de los generós Cyrtoptyx Delucchi, Caenacis Cecidostiba Thomson y Hobbya Delucchi asociados con agallas de cinipidos de los robles. Graellsia, 38, 35–42 |
| *Andricus pictus* | 40.5037389 | -6.27129353 | 1978-1979 | Nieves-Aldrey, J.L. (1982c) Nuevas datos sobre las especies de los generós Cyrtoptyx Delucchi, Caenacis Cecidostiba Thomson y Hobbya Delucchi asociados con agallas de cinipidos de los robles. Graellsia, 38, 35–43 |
| *Andricus pictus* | 40.3447381 | -5.86085046 | 1978 | Nieves-Aldrey, J.L. (1982c) Nuevas datos sobre las especies de los generós Cyrtoptyx Delucchi, Caenacis Cecidostiba Thomson y Hobbya Delucchi asociados con agallas de cinipidos de los robles. Graellsia, 38, 35–44 |
| *Andricus pictus* | 40.4888876 | -6.11198838 | 1978 | Nieves-Aldrey, J.L. (1984a) Observaciones sobre los torimidos (Hym., Chalcidoidea, Torymidae) asociados con agallas de cinipidos (Hym. Cynipidae) sobre Quercus spp. en la zona centro-occidental de España. Boletin de la Asociación Española de Entomologia, 8, 121–134. |
| *Andricus pictus* | 40.5037389 | -6.27129353 | 1978-1979 | Nieves-Aldrey, J.L. (1984a) Observaciones sobre los torimidos (Hym., Chalcidoidea, Torymidae) asociados con agallas de cinipidos (Hym. Cynipidae) sobre Quercus spp. en la zona centro-occidental de España. Boletin de la Asociación Española de Entomologia, 8, 121–134. |
| *Andricus pictus* | 40.5037389 | -6.27129353 | 1978-1979 | Nieves-Aldrey, J.L. (1984a) Observaciones sobre los torimidos (Hym., Chalcidoidea, Torymidae) asociados con agallas de cinipidos (Hym. Cynipidae) sobre Quercus spp. en la zona centro-occidental de España. Boletin de la Asociación Española de Entomologia, 8, 121–134. |
| *Andricus pictus* | 40.3447381 | -5.86085046 | 1978 | Nieves-Aldrey, J.L. (1984a) Observaciones sobre los torimidos (Hym., Chalcidoidea, Torymidae) asociados con agallas de cinipidos (Hym. Cynipidae) sobre Quercus spp. en la zona centro-occidental de España. Boletin de la Asociación Española de Entomologia, 8, 121–134. |
| *Andricus pictus* | 40.3447381 | -5.86085046 | 1978 | Nieves-Aldrey, J.L. (1984a) Observaciones sobre los torimidos (Hym., Chalcidoidea, Torymidae) asociados con agallas de cinipidos (Hym. Cynipidae) sobre Quercus spp. en la zona centro-occidental de España. Boletin de la Asociación Española de Entomologia, 8, 121–134. |
| *Andricus pictus* | 40.6146451 | -6.02071896 | 1978-1979 | Nieves-Aldrey, J.L. (1984a) Observaciones sobre los torimidos (Hym., Chalcidoidea, Torymidae) asociados con agallas de cinipidos (Hym. Cynipidae) sobre Quercus spp. en la zona centro-occidental de España. Boletin de la Asociación Española de Entomologia, 8, 121–134. |
| *Andricus pictus* | 40.7037432 | -6.40039832 | 1978 | Nieves-Aldrey, J.L. (1984a) Observaciones sobre los torimidos (Hym., Chalcidoidea, Torymidae) asociados con agallas de cinipidos (Hym. Cynipidae) sobre Quercus spp. en la zona centro-occidental de España. Boletin de la Asociación Española de Entomologia, 8, 121–134. |
| *Andricus pictus* | 41.1567005 | -5.63471833 | 1978 | Nieves-Aldrey, J.L. (1984a) Observaciones sobre los torimidos (Hym., Chalcidoidea, Torymidae) asociados con agallas de cinipidos (Hym. Cynipidae) sobre Quercus spp. en la zona centro-occidental de España. Boletin de la Asociación Española de Entomologia, 8, 121–134. |
| *Andricus pictus* | 40.5058133 | -5.76311862 | 1978 | Nieves-Aldrey, J.L. (1984a) Observaciones sobre los torimidos (Hym., Chalcidoidea, Torymidae) asociados con agallas de cinipidos (Hym. Cynipidae) sobre Quercus spp. en la zona centro-occidental de España. Boletin de la Asociación Española de Entomologia, 8, 121–134. |
| *Andricus pictus* | 40.4426421 | -6.3971502 | 1978 | Nieves-Aldrey, J.L. (1984b) Primeros datos sobre los representantes de la familia Ormyridae en España, con descripción de una nueva especie (Hym., Chalcidoidea). Graellsia, 40, 119–127 |
| *Andricus pictus* | 40.5037389 | -6.27129353 | 1978 | Nieves-Aldrey, J.L. (1984b) Primeros datos sobre los representantes de la familia Ormyridae en España, con descripción de una nueva especie (Hym., Chalcidoidea). Graellsia, 40, 119–128 |
| *Andricus pictus* | 40.8816449 | -3.89018357 | 1986 | Nieves-Aldrey, J.L. (1988) Los cinipidos gallicolas e inquilinos de la sierra de Guadarrama y zonas adyacentes (Hym. Cynipidae, Cynipinae). Eos, 64, 125–163 |
| *Andricus pictus* | 40.8459716 | -3.84225554 | 1985 | Nieves-Aldrey, J.L. (1988) Los cinipidos gallicolas e inquilinos de la sierra de Guadarrama y zonas adyacentes (Hym. Cynipidae, Cynipinae). Eos, 64, 125–164 |
| *Andricus pictus* | 40.8024198 | -3.60460636 | 1986 | Nieves-Aldrey, J.L. (1988) Los cinipidos gallicolas e inquilinos de la sierra de Guadarrama y zonas adyacentes (Hym. Cynipidae, Cynipinae). Eos, 64, 125–165 |
| *Andricus pictus* | 41.0725914 | -3.61897821 | 1986 | Nieves-Aldrey, J.L. (1988) Los cinipidos gallicolas e inquilinos de la sierra de Guadarrama y zonas adyacentes (Hym. Cynipidae, Cynipinae). Eos, 64, 125–166 |
| *Andricus pictus* | 41.1806816 | -3.61999483 | 1986 | Nieves-Aldrey, J.L. (1988) Los cinipidos gallicolas e inquilinos de la sierra de Guadarrama y zonas adyacentes (Hym. Cynipidae, Cynipinae). Eos, 64, 125–167 |
| *Andricus pictus* | 41.3260881 | -3.29873674 | 1986 | Nieves-Aldrey, J.L. (1988) Los cinipidos gallicolas e inquilinos de la sierra de Guadarrama y zonas adyacentes (Hym. Cynipidae, Cynipinae). Eos, 64, 125–168 |
| *Andricus pictus* | 41.2440394 | -3.56092114 | 1984 | Nieves-Aldrey, J.L. (1988) Los cinipidos gallicolas e inquilinos de la sierra de Guadarrama y zonas adyacentes (Hym. Cynipidae, Cynipinae). Eos, 64, 125–169 |
| *Andricus pictus* | 40.9462233 | -3.08931972 | 1984 | Nieves-Aldrey, J.L. (1988) Los cinipidos gallicolas e inquilinos de la sierra de Guadarrama y zonas adyacentes (Hym. Cynipidae, Cynipinae). Eos, 64, 125–170 |
| *Andricus pictus* | 40.7839393 | -3.68740035 | 1985 | Nieves-Aldrey, J.L. (1988) Los cinipidos gallicolas e inquilinos de la sierra de Guadarrama y zonas adyacentes (Hym. Cynipidae, Cynipinae). Eos, 64, 125–171 |
| *Andricus pictus* | 41.1001926 | -3.50015365 | 1986 | Nieves-Aldrey, J.L. (1988) Los cinipidos gallicolas e inquilinos de la sierra de Guadarrama y zonas adyacentes (Hym. Cynipidae, Cynipinae). Eos, 64, 125–172 |
| *Andricus pictus* | 40.7114311 | -3.75768669 | 1985-1986 | Nieves-Aldrey, J.L. (1988) Los cinipidos gallicolas e inquilinos de la sierra de Guadarrama y zonas adyacentes (Hym. Cynipidae, Cynipinae). Eos, 64, 125–173 |
| *Andricus pictus* | 38.9780122 | -4.87019911 | 1984 | Nieves-Aldrey, J.L. (2001a). Nuevos datos faunísticos, corológicos y biológicos sobre los cinípidos del ámbito Ibero-Balear (Hymenoptera, Cynipidae). Graellsia, 57(1), 39–72. |
| *Andricus pictus* | 40.4074946 | -1.44392421 | 1985 | Nieves-Aldrey, J.L. (2001a). Nuevos datos faunísticos, corológicos y biológicos sobre los cinípidos del ámbito Ibero-Balear (Hymenoptera, Cynipidae). Graellsia, 57(1), 39–72. |
| *Andricus pictus* | 40.3617515 | -4.50749358 | 1998 | Nieves-Aldrey, J.L. (2001a). Nuevos datos faunísticos, corológicos y biológicos sobre los cinípidos del ámbito Ibero-Balear (Hymenoptera, Cynipidae). Graellsia, 57(1), 39–72. |
| *Andricus pictus* | 36.8329739 | -4.88393885 | 1986 | Nieves-Aldrey, J.L. (2001a). Nuevos datos faunísticos, corológicos y biológicos sobre los cinípidos del ámbito Ibero-Balear (Hymenoptera, Cynipidae). Graellsia, 57(1), 39–72. |
| *Andricus pictus* | 36.8058968 | -5.38764944 | 1986 | Nieves-Aldrey, J.L. (2001a). Nuevos datos faunísticos, corológicos y biológicos sobre los cinípidos del ámbito Ibero-Balear (Hymenoptera, Cynipidae). Graellsia, 57(1), 39–72. |
| *Andricus pictus* | 36.7228312 | -4.39109392 | 1986 | Nieves-Aldrey, J.L. (2001a). Nuevos datos faunísticos, corológicos y biológicos sobre los cinípidos del ámbito Ibero-Balear (Hymenoptera, Cynipidae). Graellsia, 57(1), 39–72. |
| *Andricus pictus* | 40.4256821 | -3.75494242 | 1983 | Nieves-Aldrey, J.L. (2001a). Nuevos datos faunísticos, corológicos y biológicos sobre los cinípidos del ámbito Ibero-Balear (Hymenoptera, Cynipidae). Graellsia, 57(1), 39–72. |
| *Andricus pictus* | 39.5745966 | -4.74642866 | 1989 | Nieves-Aldrey, J.L. (2001a). Nuevos datos faunísticos, corológicos y biológicos sobre los cinípidos del ámbito Ibero-Balear (Hymenoptera, Cynipidae). Graellsia, 57(1), 39–72. |
| *Andricus pictus* | 40.4975695 | -3.17701844 | 1984 | Nieves-Aldrey, J.L. (2001a). Nuevos datos faunísticos, corológicos y biológicos sobre los cinípidos del ámbito Ibero-Balear (Hymenoptera, Cynipidae). Graellsia, 57(1), 39–72. |
| *Andricus pictus* | 40.5156502 | -3.1298484 | 1984 | Nieves-Aldrey, J.L. (2001a). Nuevos datos faunísticos, corológicos y biológicos sobre los cinípidos del ámbito Ibero-Balear (Hymenoptera, Cynipidae). Graellsia, 57(1), 39–72. |
| *Andricus pictus* | 40.6688444 | -3.0828196 | 1989 | Nieves-Aldrey, J.L. (2001a). Nuevos datos faunísticos, corológicos y biológicos sobre los cinípidos del ámbito Ibero-Balear (Hymenoptera, Cynipidae). Graellsia, 57(1), 39–72. |
| *Andricus pictus* | 40.8504743 | -3.6859094 | 2021 | Observation |
| *Andricus pictus* |  |  | 1899 | Tavares, J. da S. (1902) As zoocecidias portuguesas, enumeração das especies ate agora encontradas em Portugal e descripção de dezanove ainda nao estudadas. Annaes de Sciencias Naturaes, Porto 7(1900), 17–106. |
| *Andricus pictus* | 39.0418844 | -9.26537105 | 1898 | Tavares, J. da S. (1902) As zoocecidias portuguesas, enumeração das especies ate agora encontradas em Portugal e descripção de dezanove ainda nao estudadas. Annaes de Sciencias Naturaes, Porto 7(1900), 17–106. |
| *Andricus pictus* | 39.0932629 | -9.25955098 | 1899 | Tavares, J. da S. (1902) As zoocecidias portuguesas, enumeração das especies ate agora encontradas em Portugal e descripção de dezanove ainda nao estudadas. Annaes de Sciencias Naturaes, Porto 7(1900), 17–106. |
| *Andricus pictus* |  |  | 1900 | Tavares, J. da S. (1902) As zoocecidias portuguesas, enumeração das especies ate agora encontradas em Portugal e descripção de dezanove ainda nao estudadas. Annaes de Sciencias Naturaes, Porto 7(1900), 17–106. |
| *Andricus pictus* |  |  | 1900 | Tavares, J. da S. (1902) As zoocecidias portuguesas, enumeração das especies ate agora encontradas em Portugal e descripção de dezanove ainda nao estudadas. Annaes de Sciencias Naturaes, Porto 7(1900), 17–106. |
| *Andricus pictus* | 40.0780776 | -7.49654487 | 1899 | Tavares, J. da S. (1902) As zoocecidias portuguesas, enumeração das especies ate agora encontradas em Portugal e descripção de dezanove ainda nao estudadas. Annaes de Sciencias Naturaes, Porto 7(1900), 17–106. |
| *Andricus pictus* | 40.0429482 | -7.50129341 | 1900 | Tavares, J. da S. (1902) As zoocecidias portuguesas, enumeração das especies ate agora encontradas em Portugal e descripção de dezanove ainda nao estudadas. Annaes de Sciencias Naturaes, Porto 7(1900), 17–106. |
| *Andricus pictus* | 38.526711 | -8.8877198 | 1900 | Tavares, J. da S. (1902) As zoocecidias portuguesas, enumeração das especies ate agora encontradas em Portugal e descripção de dezanove ainda nao estudadas. Annaes de Sciencias Naturaes, Porto 7(1900), 17–106. |
| *Andricus pictus* |  |  | 1900 | Tavares, J. da S. (1902) As zoocecidias portuguesas, enumeração das especies ate agora encontradas em Portugal e descripção de dezanove ainda nao estudadas. Annaes de Sciencias Naturaes, Porto 7(1900), 17–106. |
| *Andricus pictus* | 35.7866952 | -5.9142065 | 1904 | N. HOUARD, C., 1912. Les Zoocécidies du Nord de l'Afrique. Annl. Soc. entom. Fr., 81 |
| *Andricus pictus* | 34.822643 | -0.99286836 | 1908 | N. HOUARD, C., 1912. Les Zoocécidies du Nord de l'Afrique. Annl. Soc. entom. Fr., 81 |
| *Andricus pictus* | 36.7736108 | 8.68477827 | 1910 | N. HOUARD, C., 1912. Les Zoocécidies du Nord de l'Afrique. Annl. Soc. entom. Fr., 81 |
| *Andricus pictus* | 36.7976483 | 2.99159799 | 1909 | N. HOUARD, C., 1912. Les Zoocécidies du Nord de l'Afrique. Annl. Soc. entom. Fr., 81 |
| *Andricus pictus* | 34.8935173 | -1.30795066 | 1902 | N. HOUARD, C., 1912. Les Zoocécidies du Nord de l'Afrique. Annl. Soc. entom. Fr., 81 |
| *Andricus pictus* | 39.9804372 | -2.86254003 |  | Dalla Torre, K. W. y Kieffer J. J.,1910. Cynipidae. Das Tierreich, 24, Berlin. |
| *Andricus pictus* | 40.0322496 | -7.483385 |  | Dalla Torre, K. W. y Kieffer J. J.,1910. Cynipidae. Das Tierreich, 24, Berlin. |
| *Andricus pictus* | 39.6229733 | -5.38420627 | 2017 | <https://www.inaturalist.org/observations/30232899> |
| *Andricus pictus* | 39.0875076 | -8.07051983 | 2019 | <https://www.inaturalist.org/observations/34211361> |
| *Andricus pictus* | 39.2438393 | -9.30587578 | 2020 | <https://www.inaturalist.org/observations/57247443> |
| *Andricus pictus* | 38.993824 | -8.01557827 | 2020 | <https://www.inaturalist.org/observations/58169532> |
| *Andricus pictus* | 39.399872 | -8.22445415 | 2020 | <https://www.inaturalist.org/observations/53589196> |
| *Andricus pictus* | 41.5922931 | -6.36366812 | 2020 | <https://www.inaturalist.org/observations/59142038> |
| *Andricus pictus* | 41.0365 | -3.4898 | 2021 | https://observation.org/species/612485/observations/? |
